# Supplementary material for: Effective degradation of DELTA pesticide in soil by an atmospheric-pressure cold plasma-DBD system
Source: Royal Society of Chemistry journal article supplement (doi:10.1039/d5ra08882h), 2026-01-01

## Effective Degradation of DELTA Pesticide in Soil by Atmospheric-pressure Cold Plasma-DBD System

Sushma Jangra<sup>1</sup>, Abhijit Mishra<sup>1</sup>, Ritesh Mishra<sup>2</sup>, Shikha Pandey<sup>1</sup> and Ram Prakash<sup>1,2</sup>

*Department of Physics, Indian Institute of Technology Jodhpur, Rajasthan, India, 342030*

*<sup>2</sup>Interdisciplinary Research Division- Smart Healthcare, Indian Institute of Technology Jodhpur, Rajasthan, India, 342030*

*E-mail address: [ramprakash@iitj.ac.in](mailto:ramprakash@iitj.ac.in)*

### SE.1 Sampling Procedures.

For neutral and alkaline cocopeat soil, all the soil samples were mixed with 50 mL NaOH solution (pH = 11.0) in airtight sealed conical flask and then shaken on a shaker at 300 rpm for 12 h to extract DELTA from the soil samples, then the mixture was centrifuged at 3000 rpm for 15 min. After centrifugation the extract was passed through a 0.45  $\mu$ m filter, 1 mL filtrate was used for DELTA analysis, A 1 mL aliquot of the filtrate was collected for DELTA analysis. For acidic soils (HCl-treated), the extraction was performed using 50 mL of methanol instead of NaOH under identical conditions. The samples were shaken at 300 rpm for 12 hours in sealed conical flasks, followed by centrifugation at 3000 rpm for 15 minutes. The resulting extracts were similarly filtered through a 0.45  $\mu$ m membrane filter, and 1 mL of the filtrate was used for further DELTA analysis.

### SE.2 High Performance Liquid Chromatography (HPLC) analysis

(a)

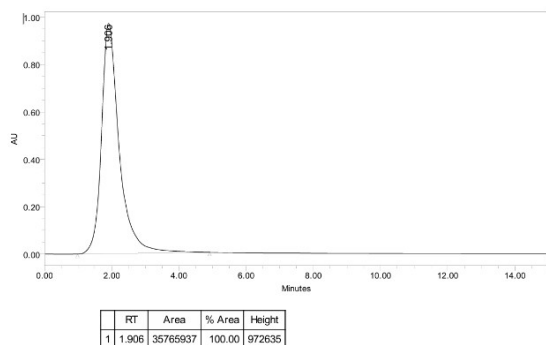

Fig. SE.2 (a) Untreated sample of soil

(b)

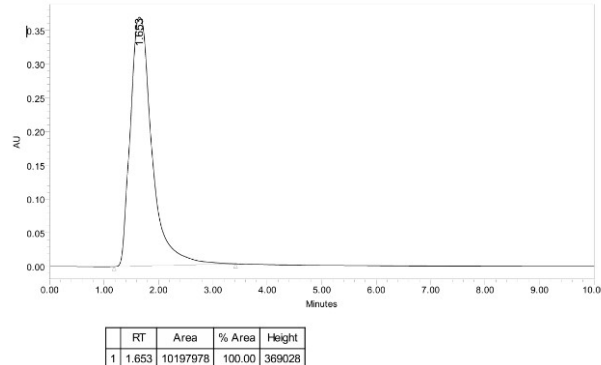

Fig. SE.2 (b) 5 min treated sample soil

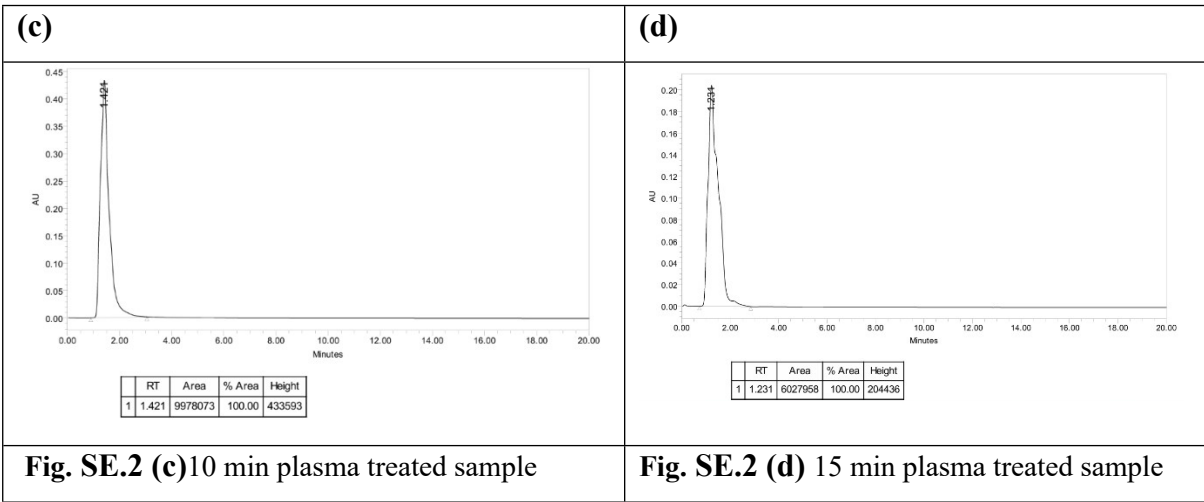

SE.3 Gas Chromatography Mass Spectrometry (GC-MS) analysis

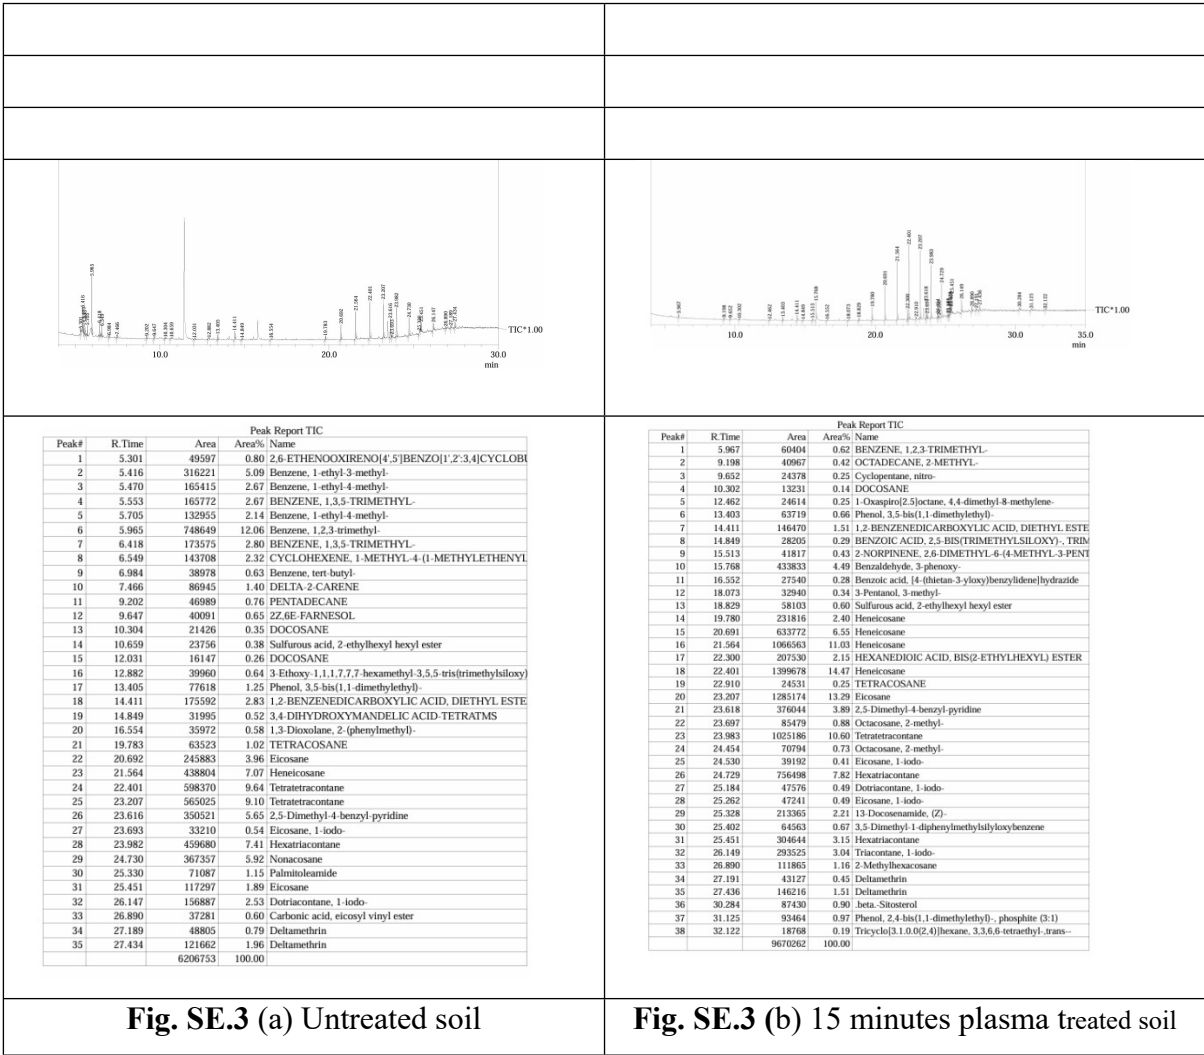

Supplement: d5ra08882h1.pdf [file d5ra08882h1.pdf]
